# Supplementary material
Source: Springer Nature journal article supplement (https://www.springermedizin.de/resource/supplementary/13098_2012_153_MOESM3_ESM.pdf/9670612)

Identification

572 records identified through  
database searching  
(Pubmed: 274, Web Of Science: 116,  
Scopus: 182)

4 additional records identified  
through other sources

Screening

154 records after duplicate removal

154 records screened

110 records excluded

Eligibility

44 full text articles  
assessed for eligibility

19 full text articles  
excluded

Included

25 studies included in  
qualitative synthesis

14 studies included  
in quantitative synthesis  
(Meta analysis)

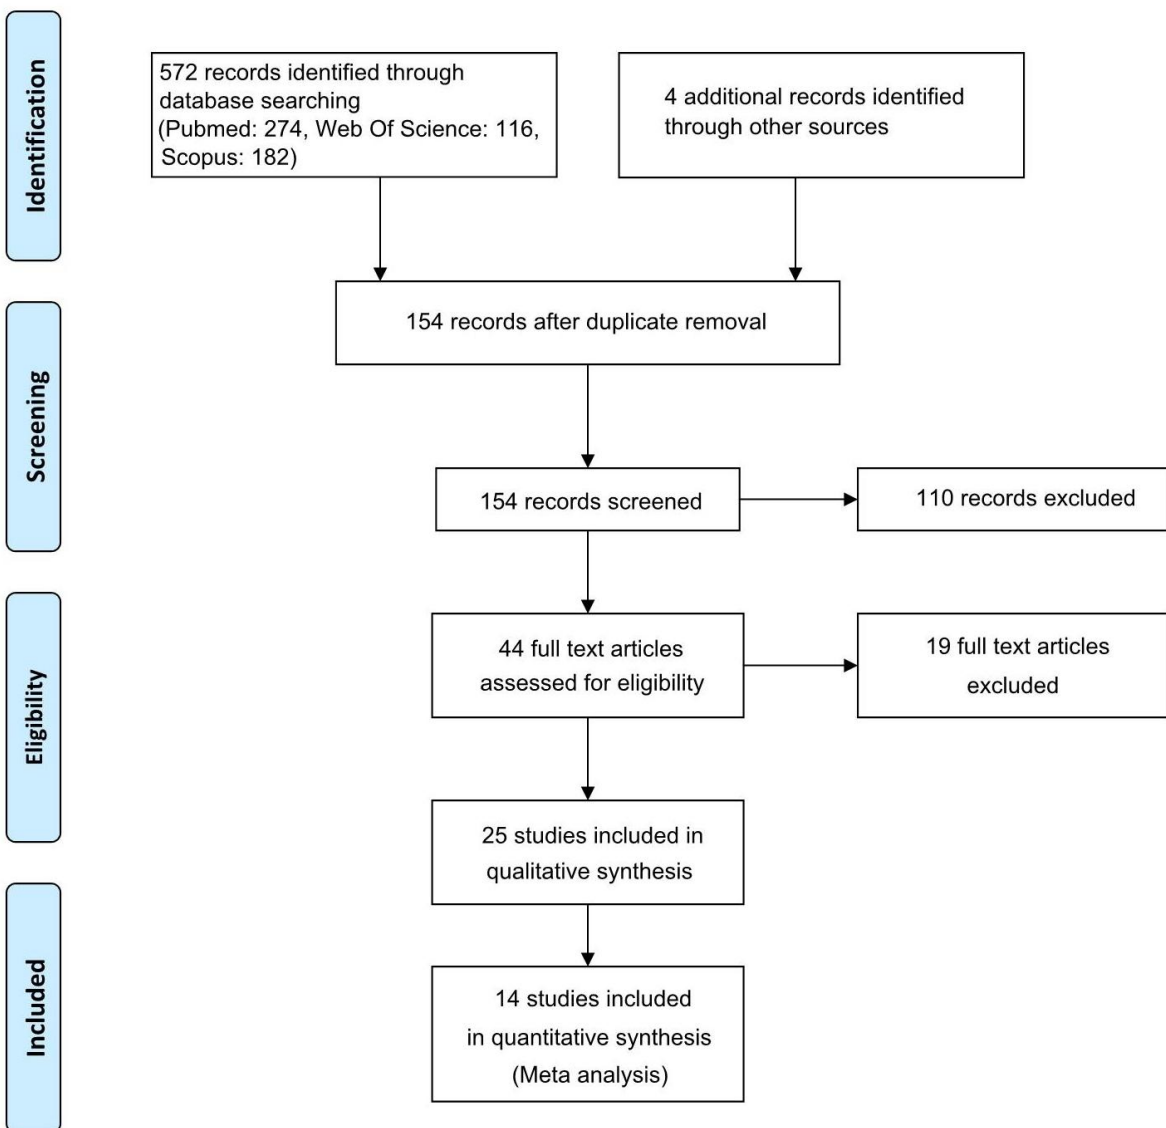

Supplement: MOESM3 [file 9670612]
